# Supplementary material for: Design, synthesis, anticancer and in silico assessment of 8-piperazinyl caffeinyl-triazolylmethyl hybrid conjugates
Source: Royal Society of Chemistry journal article supplement (doi:10.1039/d3ra04817a), 2023-01-01
Supplement: d3ra04817a1.pdf [file d3ra04817a1.pdf]

# RSC Advances

## (Electronic Supplementary Information)

---

### **Design, Synthesis, Anticancer and In Silico Assessment of 8-Piperazinyl caffeinyl-triazolylmethyl Hybrid Conjugates**

Mohammad Navid Soltani Rad, <sup>a,b\*</sup> Somayeh Behrouz, <sup>a,b\*</sup> Kiana Shahbazkhani,<sup>a</sup> Marzieh Behrouz,<sup>a</sup> Elham Zarenezhad <sup>c</sup> and Ali Ghanbariasad <sup>d</sup>

*a) Department of Chemistry, Shiraz University of Technology, Shiraz 71555-313, Iran*

*b) Medicinal Chemistry Research Laboratory, Novel Technology for Health Research Center, Shiraz University of Technology, Shiraz 71555-313, Iran*

*c) Non-communicable Diseases Research Center, Fasa University of Medical Sciences, Fasa, Iran.*

*d) Department of Medical Biotechnology, School of Medicine, Fasa University of Medical Sciences, Fasa, Iran*

phone: +98-711-7261392; fax: +98-711-7354523

e-mail: soltani@sutech.ac.ir (M.N. Soltani Rad); behrouz@sutech.ac.ir (S. Behrouz)

## Table of Content

| <b>Content</b>                                         | <b>Page</b> |
|--------------------------------------------------------|-------------|
| InChI code of synthesized compounds                    | 3           |
| <sup>1</sup> HNMR and <sup>13</sup> CNMR of <b>13</b>  | 5           |
| <sup>1</sup> HNMR and <sup>13</sup> CNMR of <b>12a</b> | 6           |
| <sup>1</sup> HNMR and <sup>13</sup> CNMR of <b>12b</b> | 7           |
| <sup>1</sup> HNMR and <sup>13</sup> CNMR of <b>12c</b> | 8           |
| <sup>1</sup> HNMR and <sup>13</sup> CNMR of <b>12d</b> | 9           |
| <sup>1</sup> HNMR and <sup>13</sup> CNMR of <b>12e</b> | 10          |
| <sup>1</sup> HNMR and <sup>13</sup> CNMR of <b>12f</b> | 11          |
| <sup>1</sup> HNMR and <sup>13</sup> CNMR of <b>12g</b> | 12          |
| <sup>1</sup> HNMR and <sup>13</sup> CNMR of <b>12h</b> | 13          |
| <sup>1</sup> HNMR and <sup>13</sup> CNMR of <b>12i</b> | 14          |
| <sup>1</sup> HNMR and <sup>13</sup> CNMR of <b>12j</b> | 15          |
| <sup>1</sup> HNMR and <sup>13</sup> CNMR of <b>12k</b> | 16          |
| <sup>1</sup> HNMR and <sup>13</sup> CNMR of <b>12l</b> | 17          |
| <sup>1</sup> HNMR and <sup>13</sup> CNMR of <b>12m</b> | 18          |
| <sup>1</sup> HNMR and <sup>13</sup> CNMR of <b>12n</b> | 19          |
| <sup>1</sup> HNMR and <sup>13</sup> CNMR of <b>12o</b> | 20          |

## InChI code of synthesized compounds

| Entry | Compound | Structure                                                                           | InChI code                |
|-------|----------|-------------------------------------------------------------------------------------|---------------------------|
| 1     | 13       | 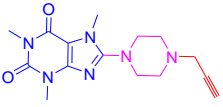   | IXEPZLLCUJMVEQ-UHFFFAOYAA |
| 2     | 12a      |    | OXAROKAXPXZODL-UHFFFAOYAZ |
| 3     | 12b      |    | JRDHGQWVTNDVIF-UHFFFAOYAT |
| 4     | 12c      |   | UFFBQYCBPFVRNJ-UHFFFAOYAD |
| 5     | 12d      |  | YVUMHLXADYKJNZ-UHFFFAOYAV |
| 6     | 12e      |  | FWQADNJWAIHORM-UHFFFAOYAO |
| 7     | 12f      |  | FPYHVBBLVYROFN-UHFFFAOYAK |
| 8     | 12g      |  | UNSGIVSXMWLSER-UHFFFAOYAS |
| 9     | 12h      |  | PSNJLCCEOLSQPK-UHFFFAOYAT |

## InChI code of synthesized compounds (continued)

| Entry | Compound | Structure                                                                           | InChI code                |
|-------|----------|-------------------------------------------------------------------------------------|---------------------------|
| 10    | 12i      | 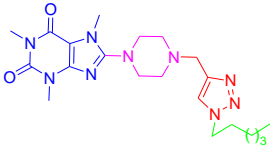   | BRJDCWDNKMKSL-UHFFFAOYAB  |
| 11    | 12j      |    | RJBZFDGNIOCTMC-UHFFFAOYAB |
| 12    | 12k      |    | OPYZVNRJNJKSHR-UHFFFAOYAV |
| 13    | 12l      |    | YSYOPXCVUDVAJV-UHFFFAOYAE |
| 14    | 12m      |   | WOHSKIGRZLSCBR-UHFFFAOYAR |
| 15    | 12n      |  | MSKFZPBJRMXTFW-UHFFFAOYAI |
| 16    | 12o      |  | GECUSYUHIBEIAZ-UHFFFAOYAI |

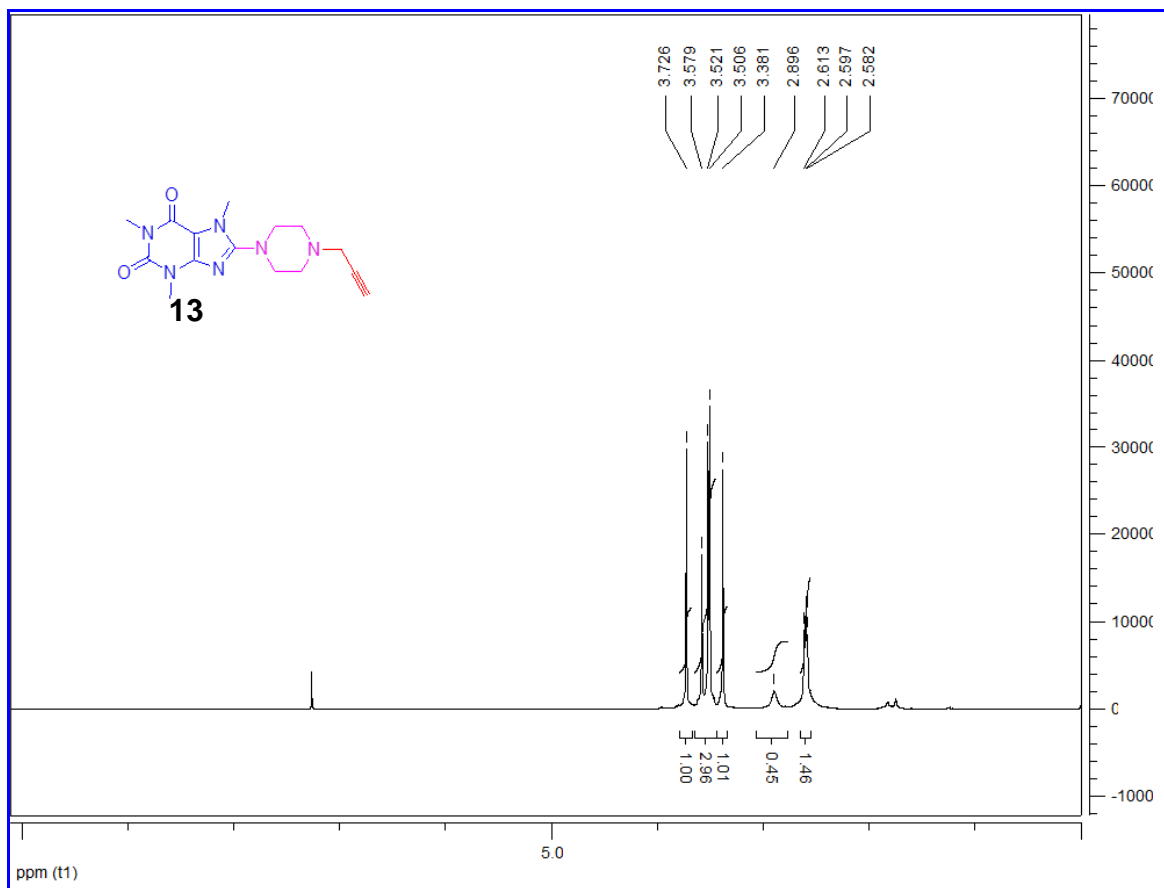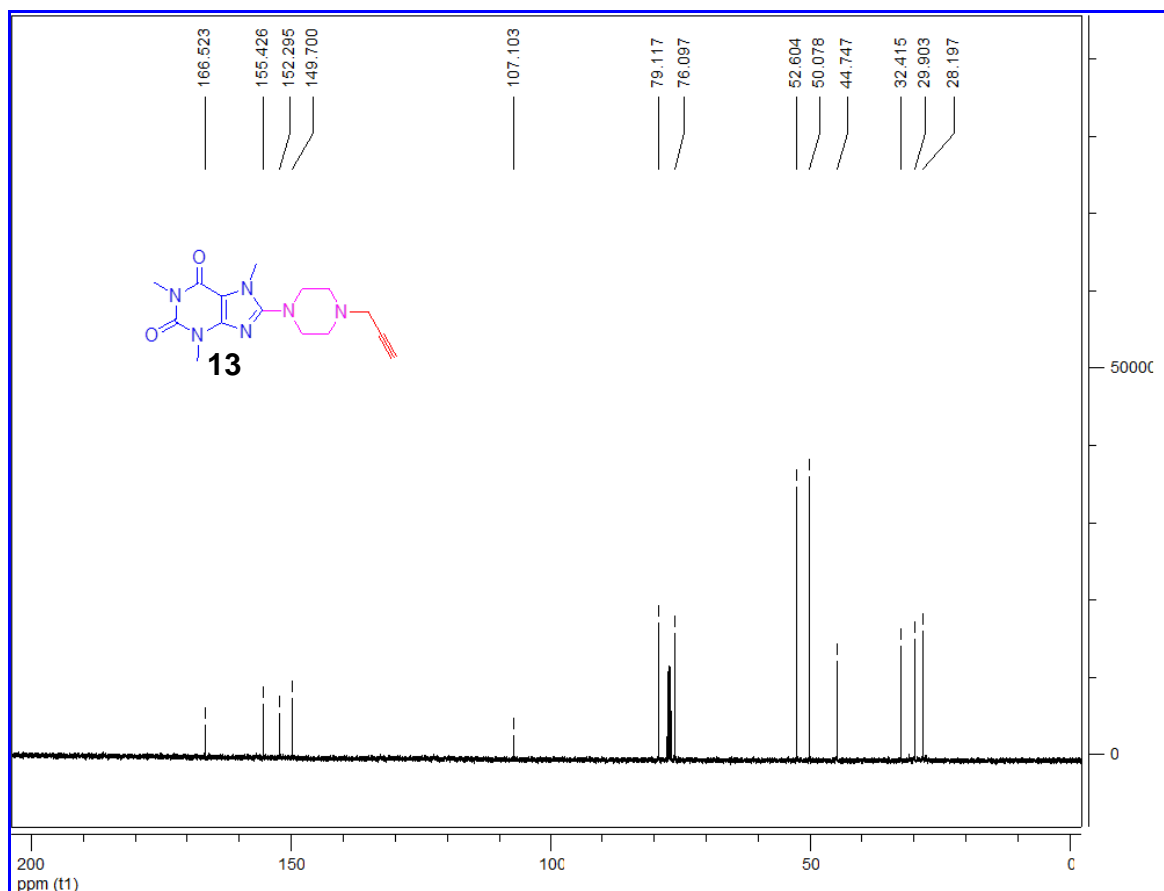

<sup>1</sup>H NMR and <sup>13</sup>C NMR of **13**

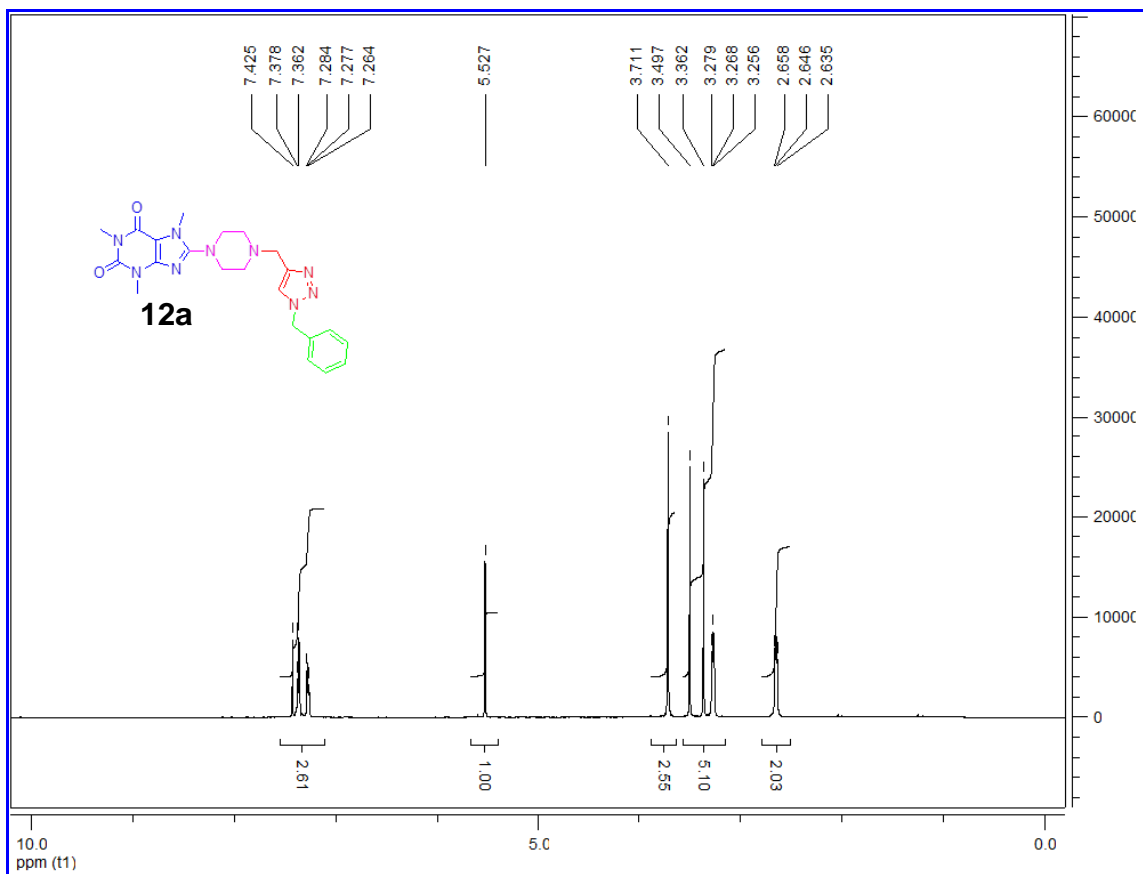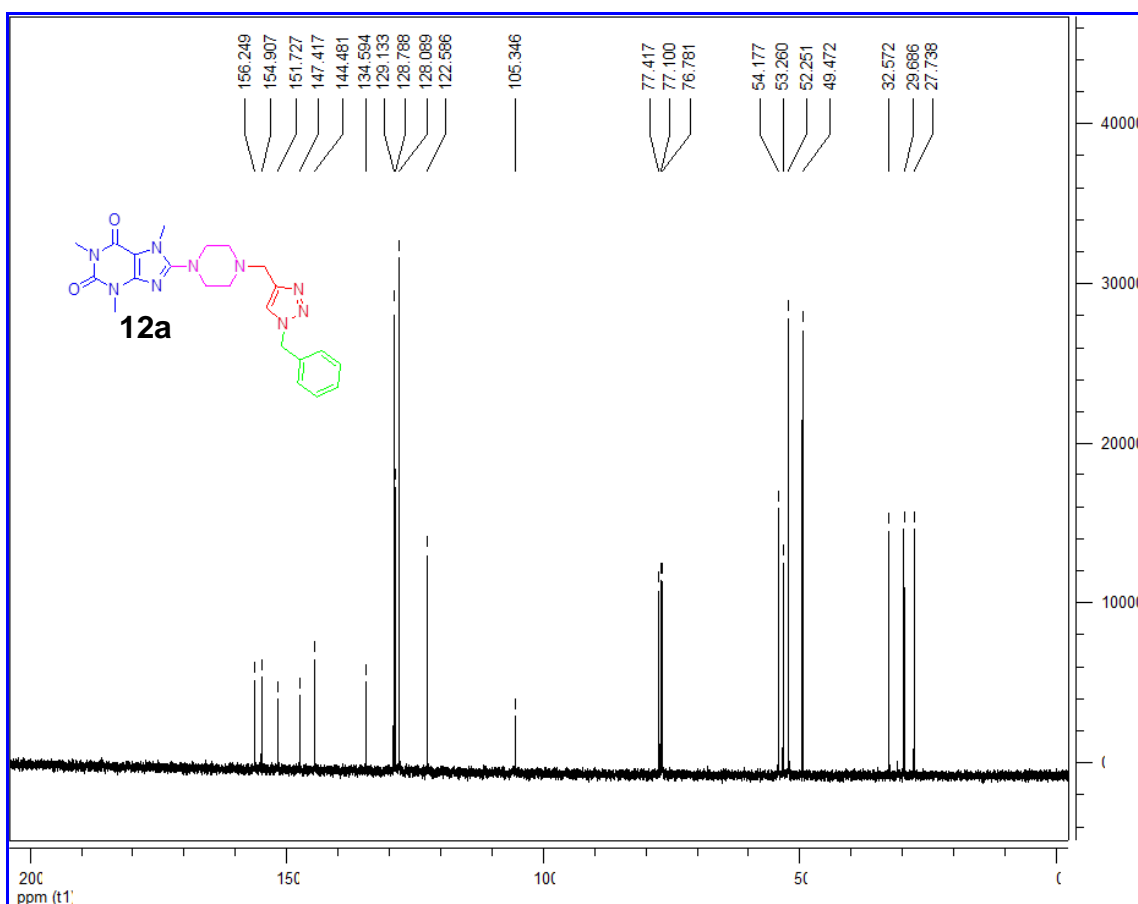

$^1\text{H}$ NMR and  $^{13}\text{C}$ NMR of **12a**

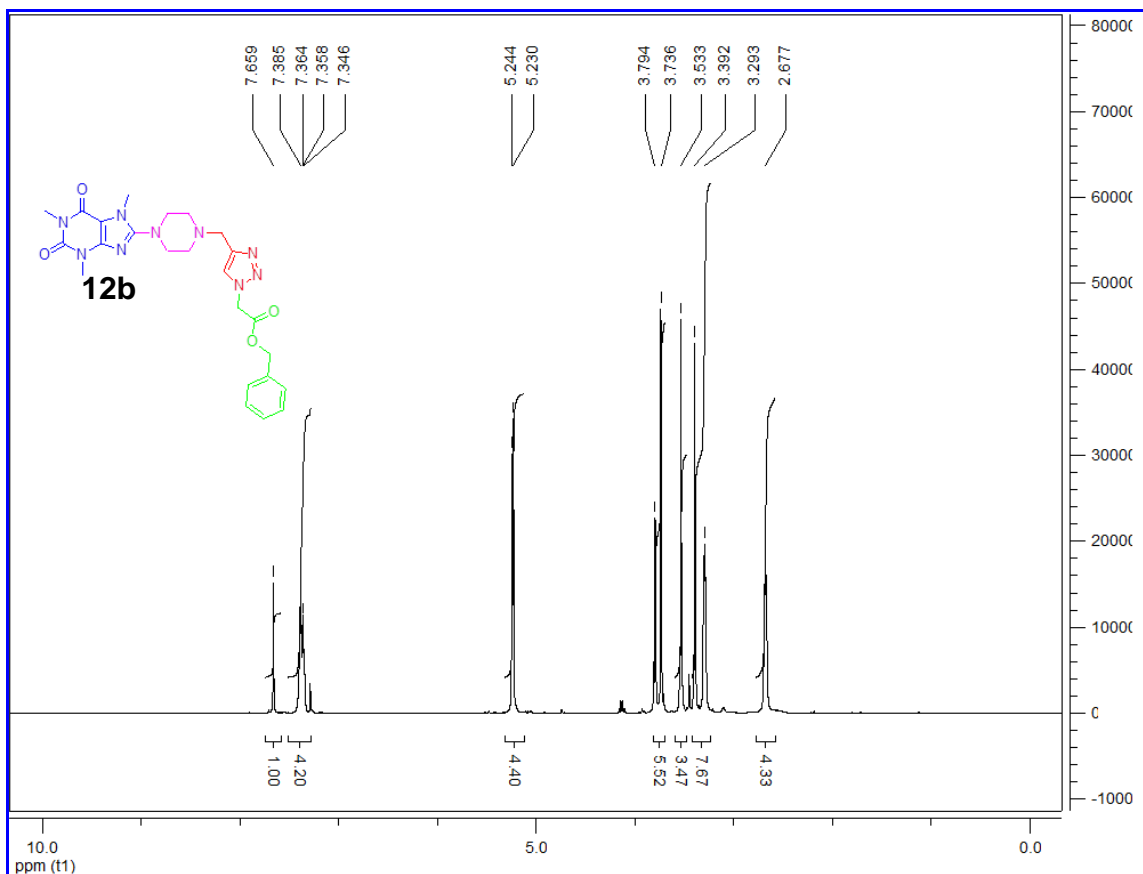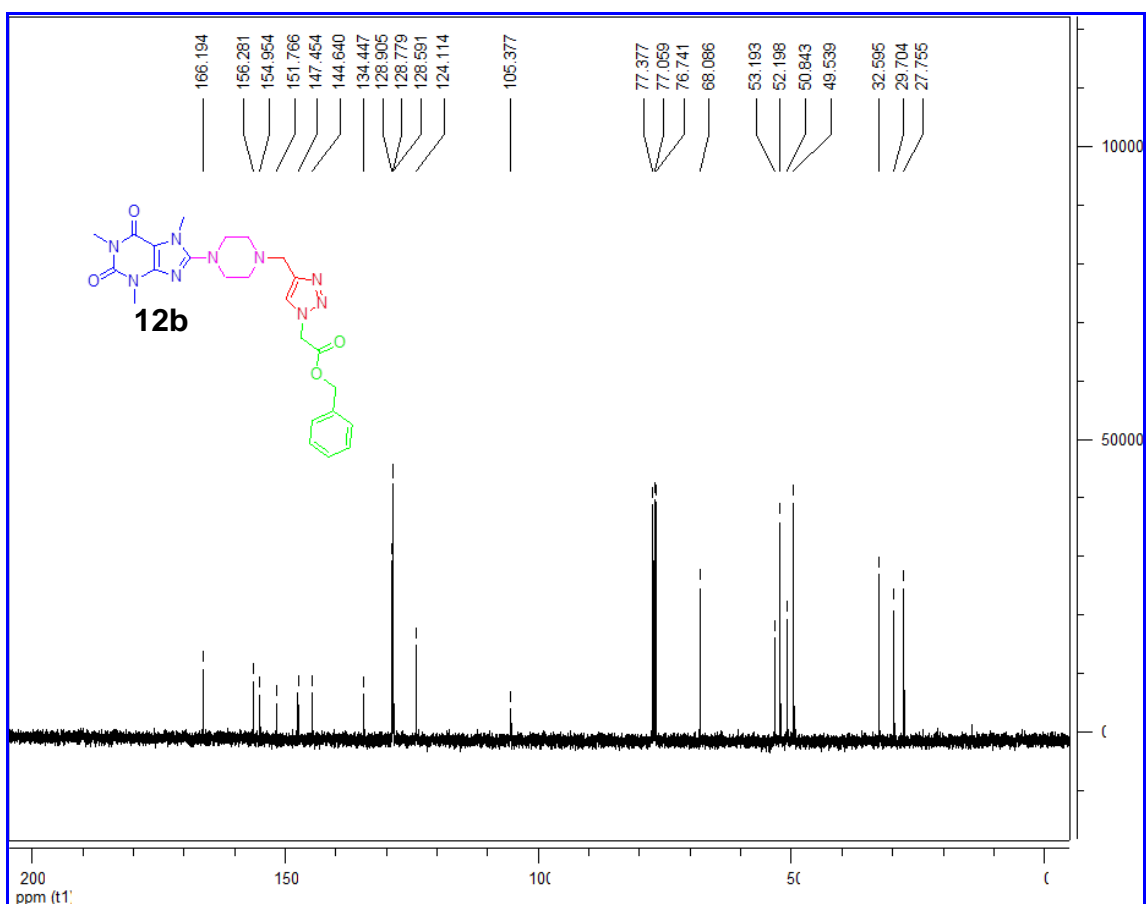

**<sup>1</sup>H NMR and <sup>13</sup>C NMR of 12b**

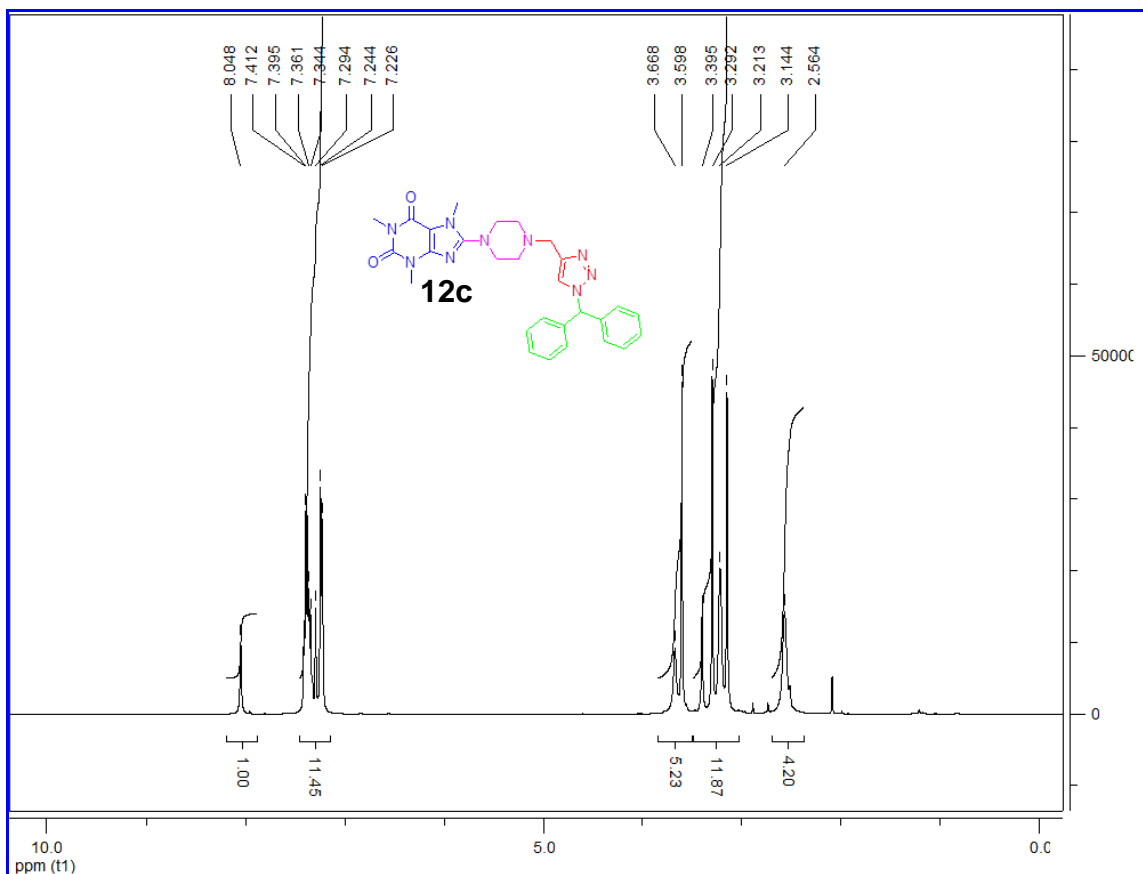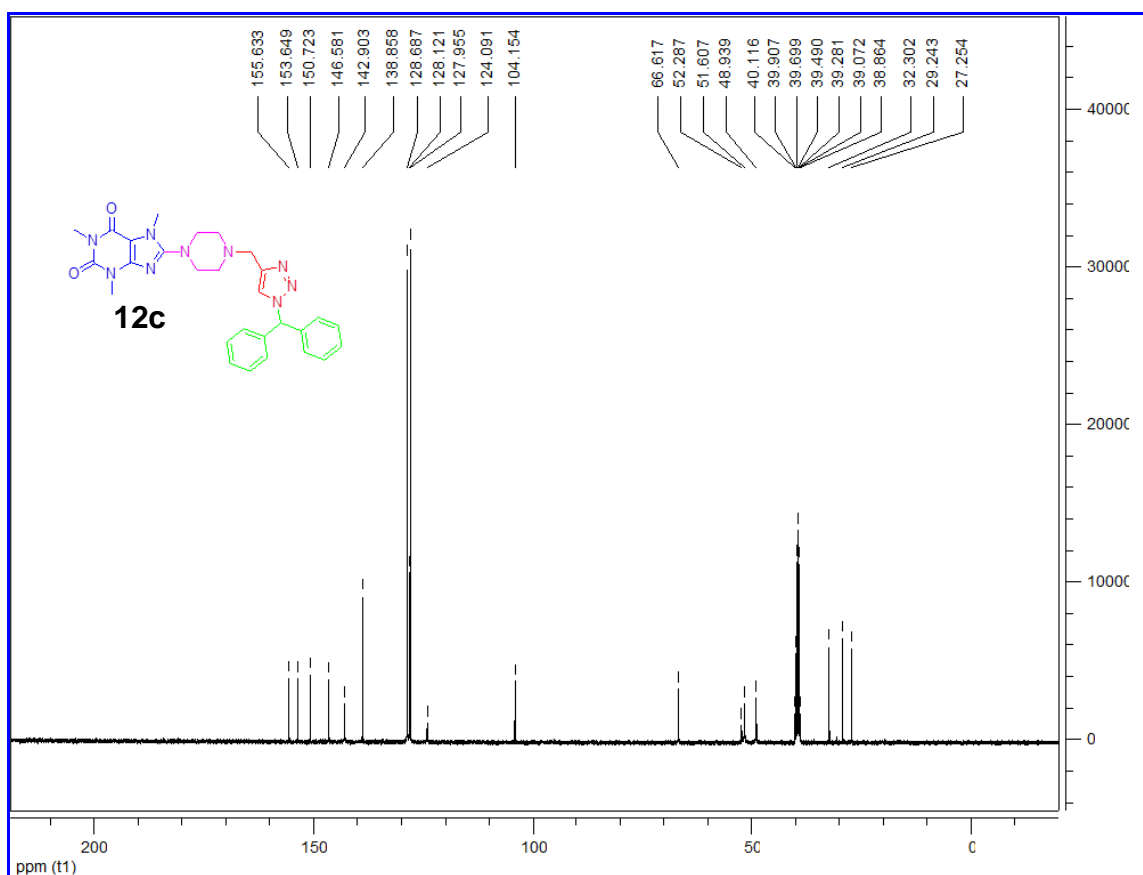

**<sup>1</sup>H NMR and <sup>13</sup>C NMR of 12c**



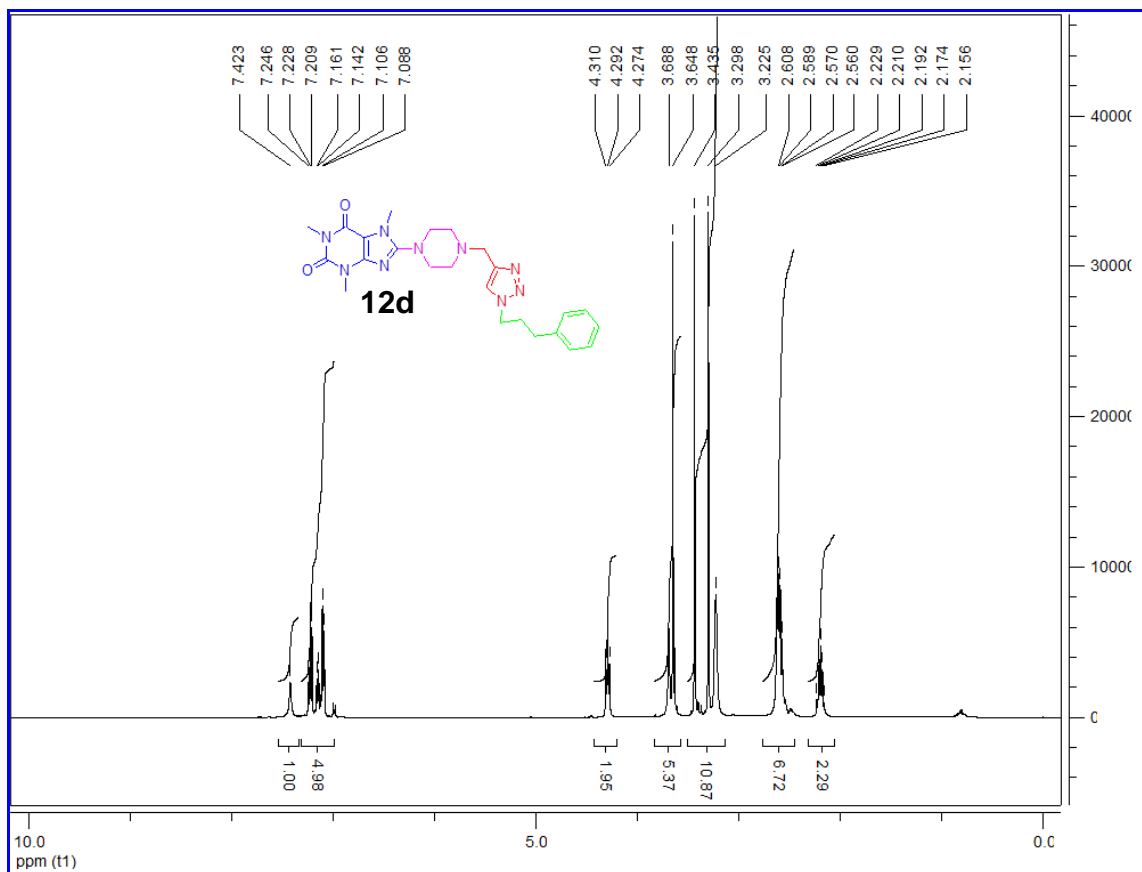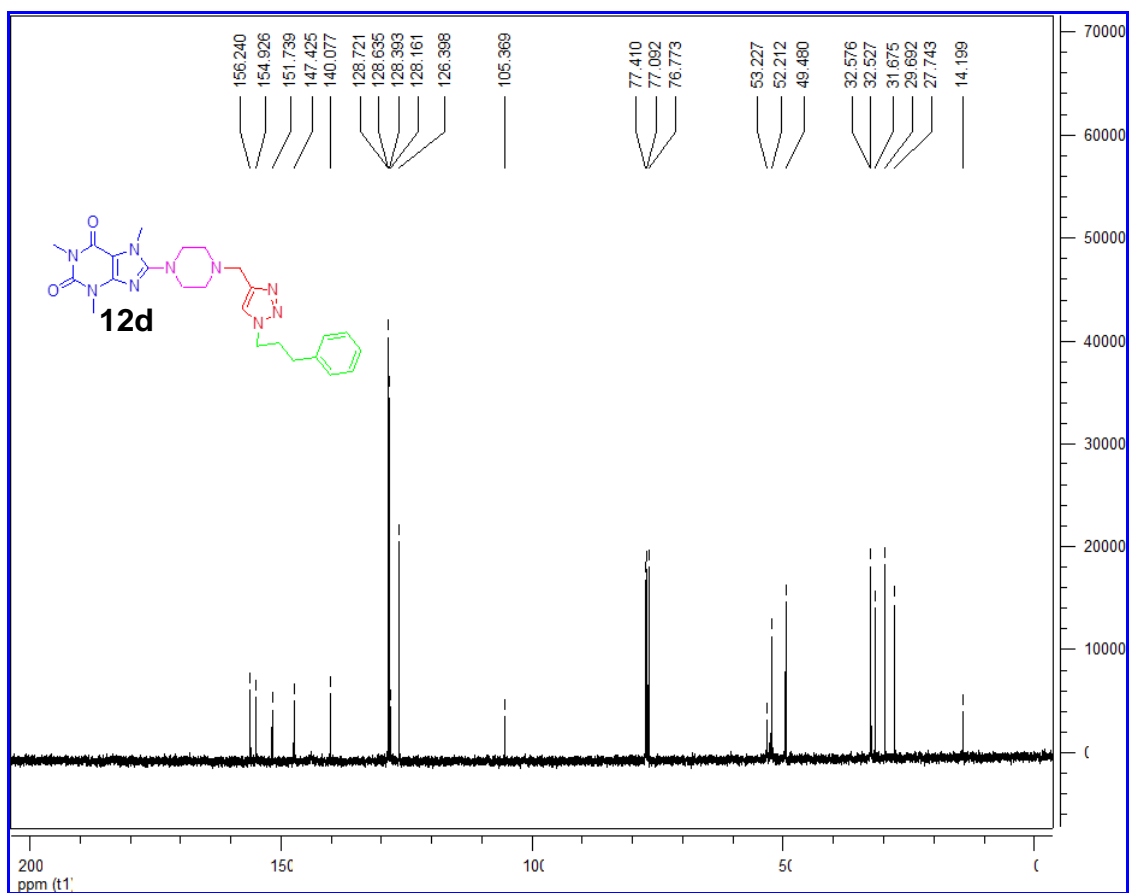

<sup>1</sup>H NMR and <sup>13</sup>C NMR of **12d**

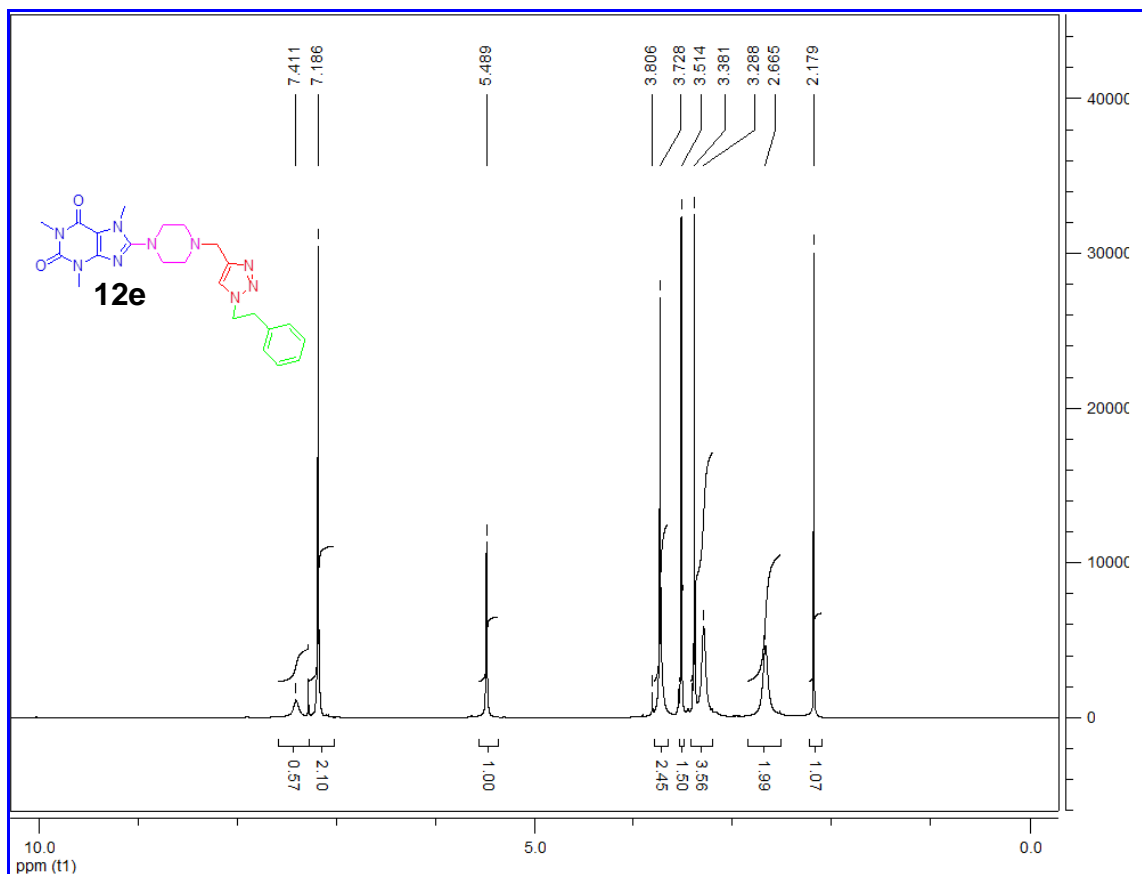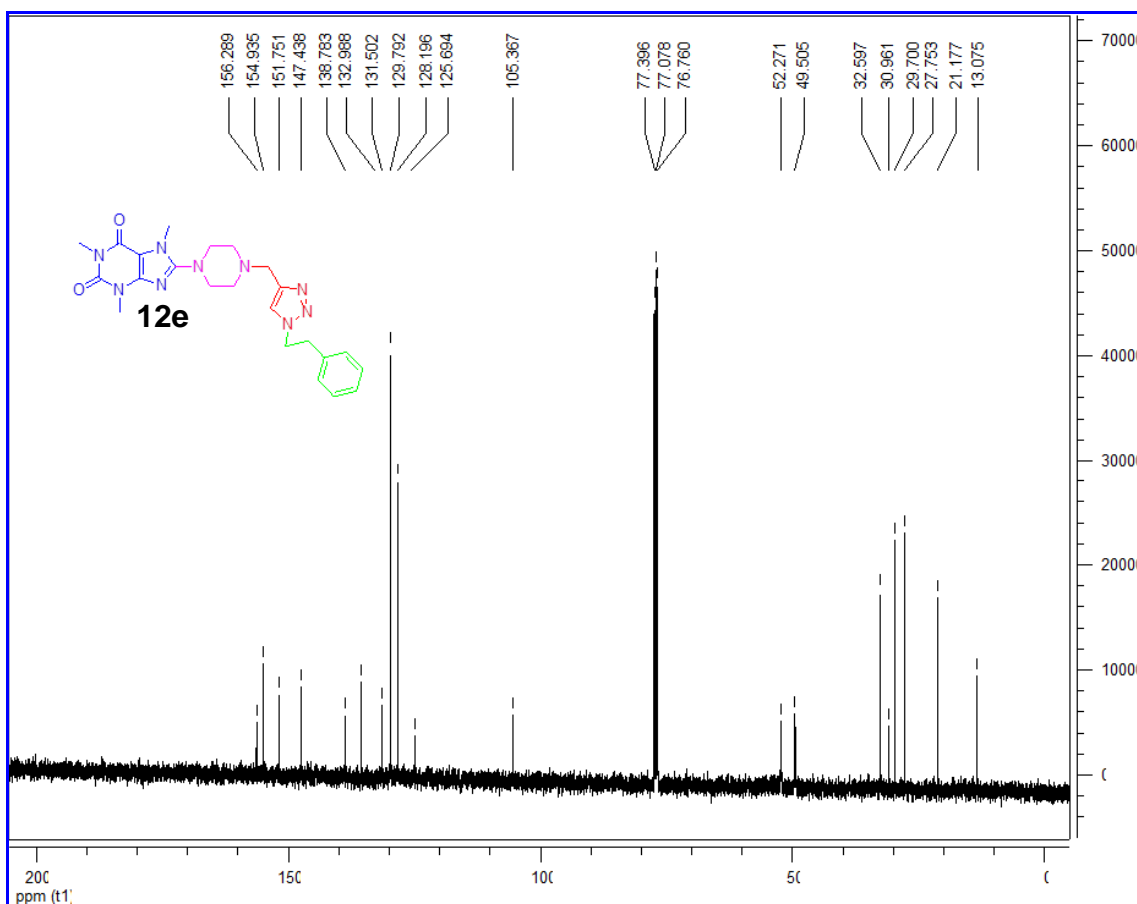

$^1\text{H}$ NMR and  $^{13}\text{C}$ NMR of **12e**

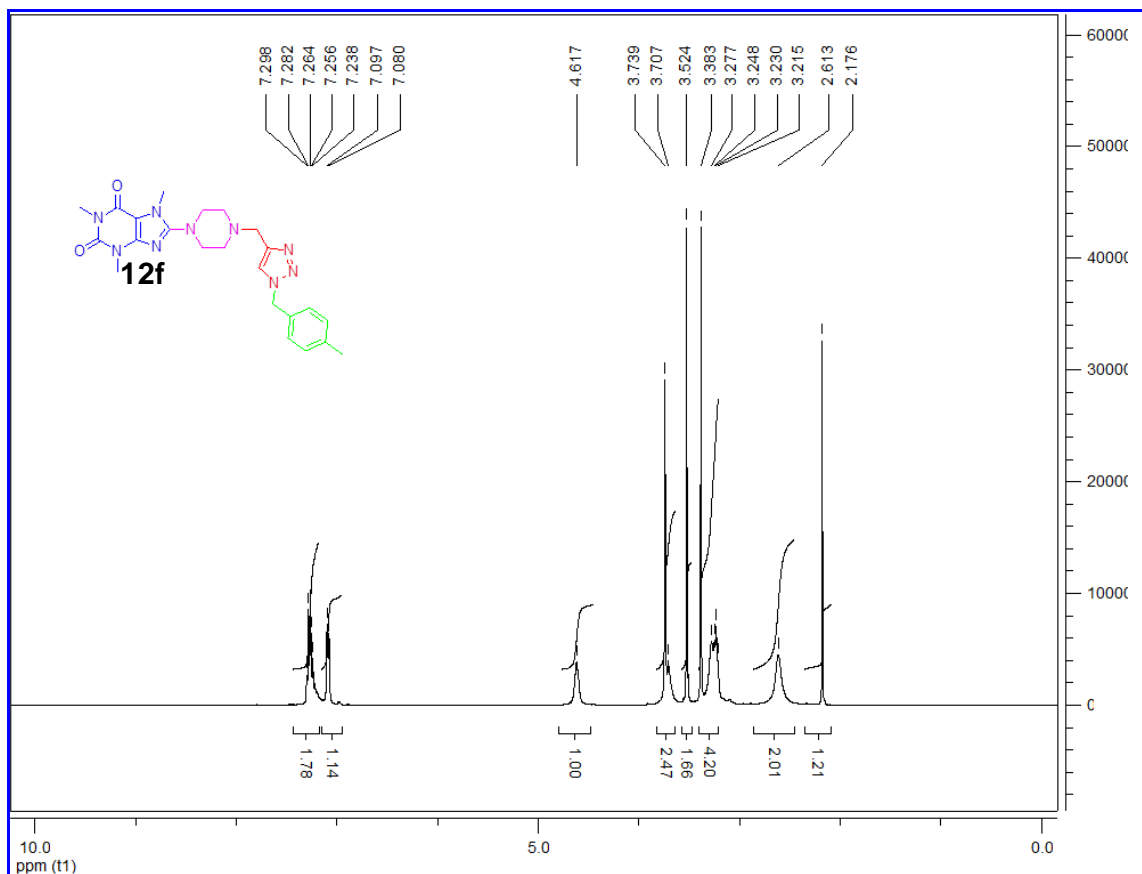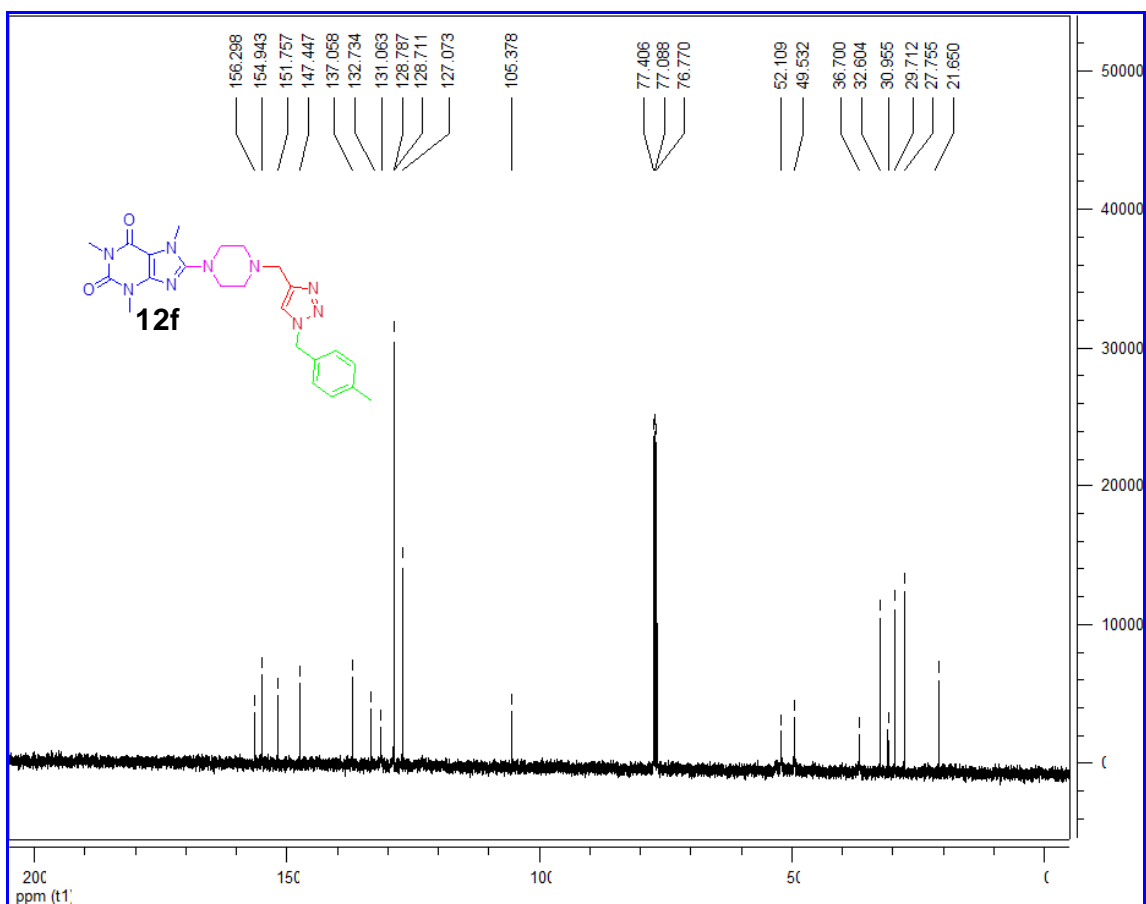

$^1\text{H}$ NMR and  $^{13}\text{C}$ NMR of **12f**

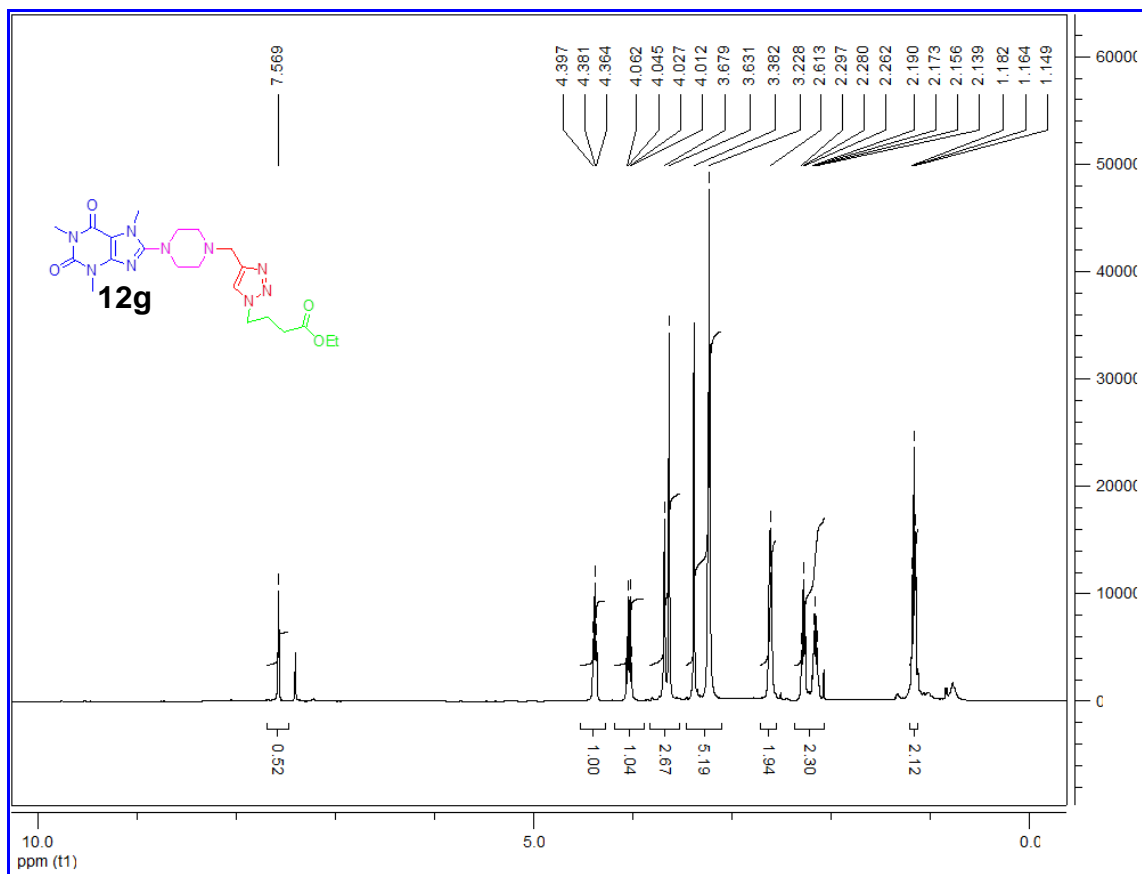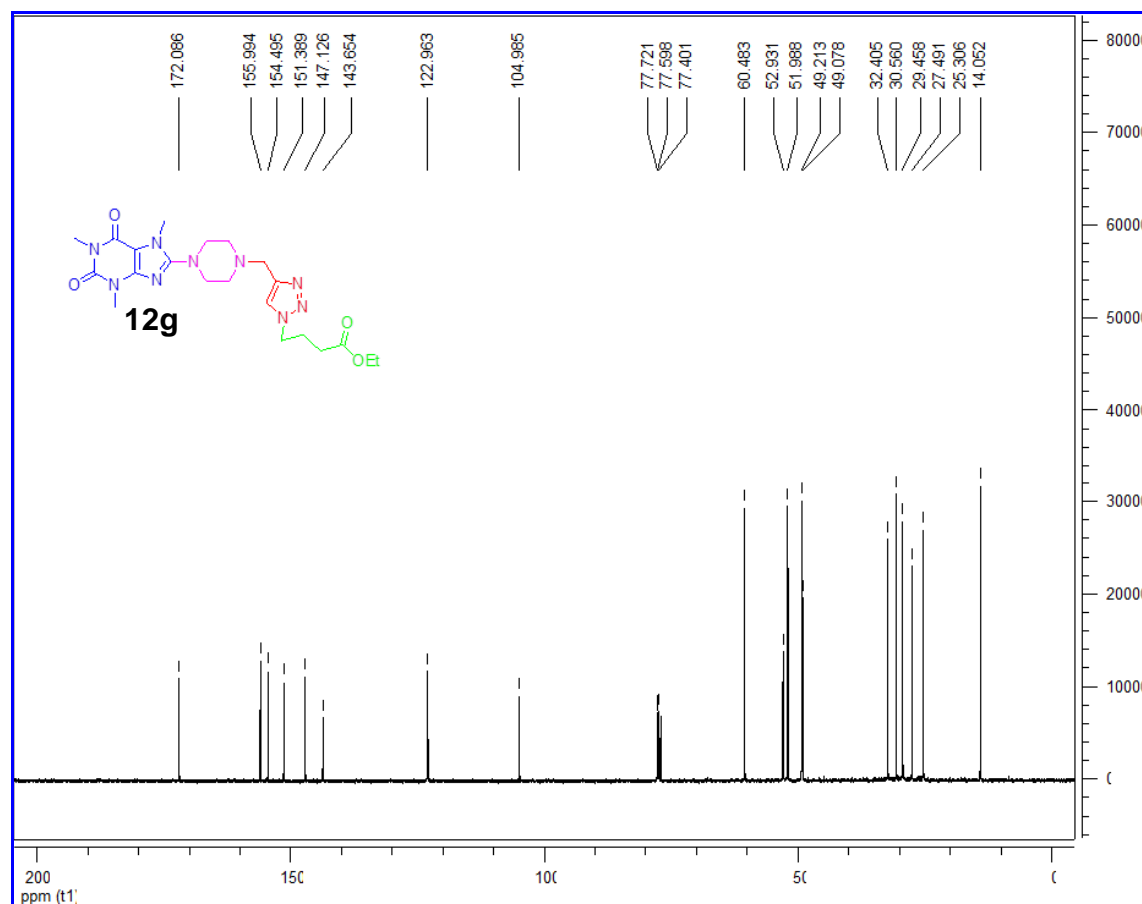

$^1\text{H}$ NMR and  $^{13}\text{C}$ NMR of **12g**

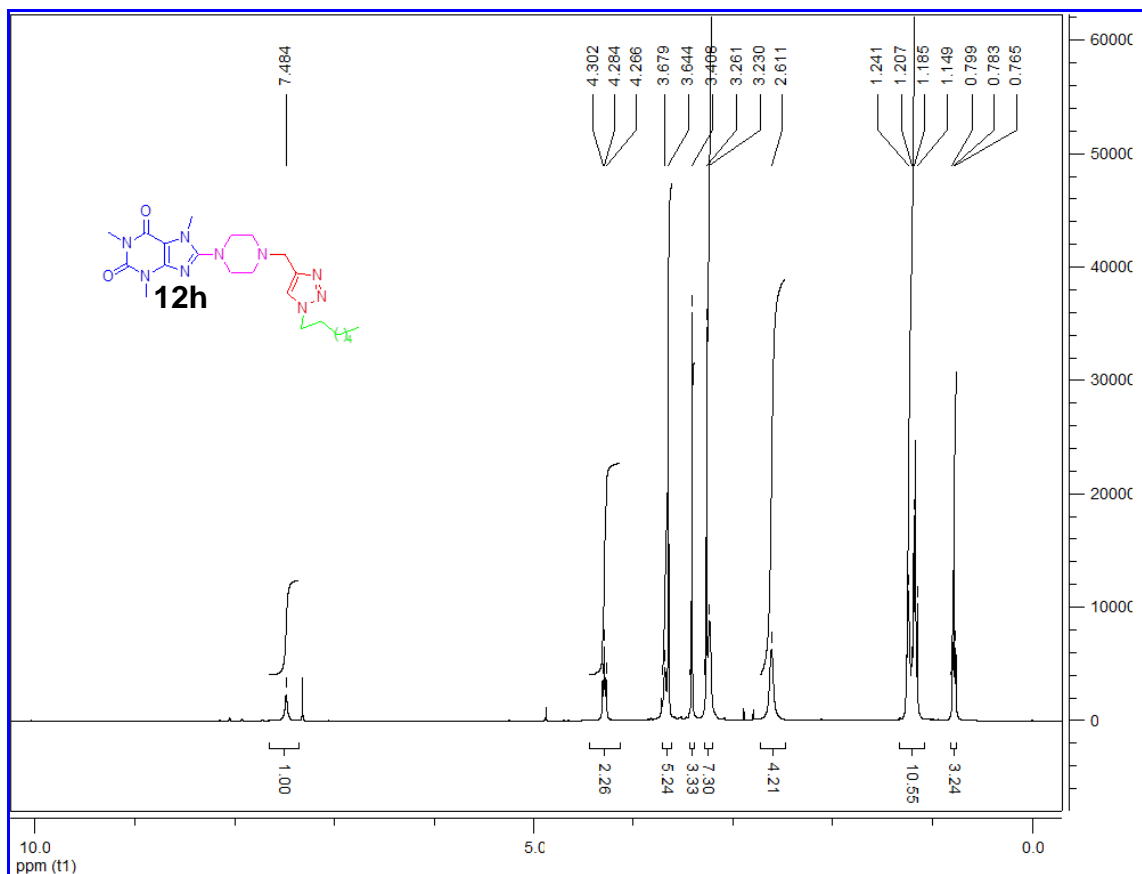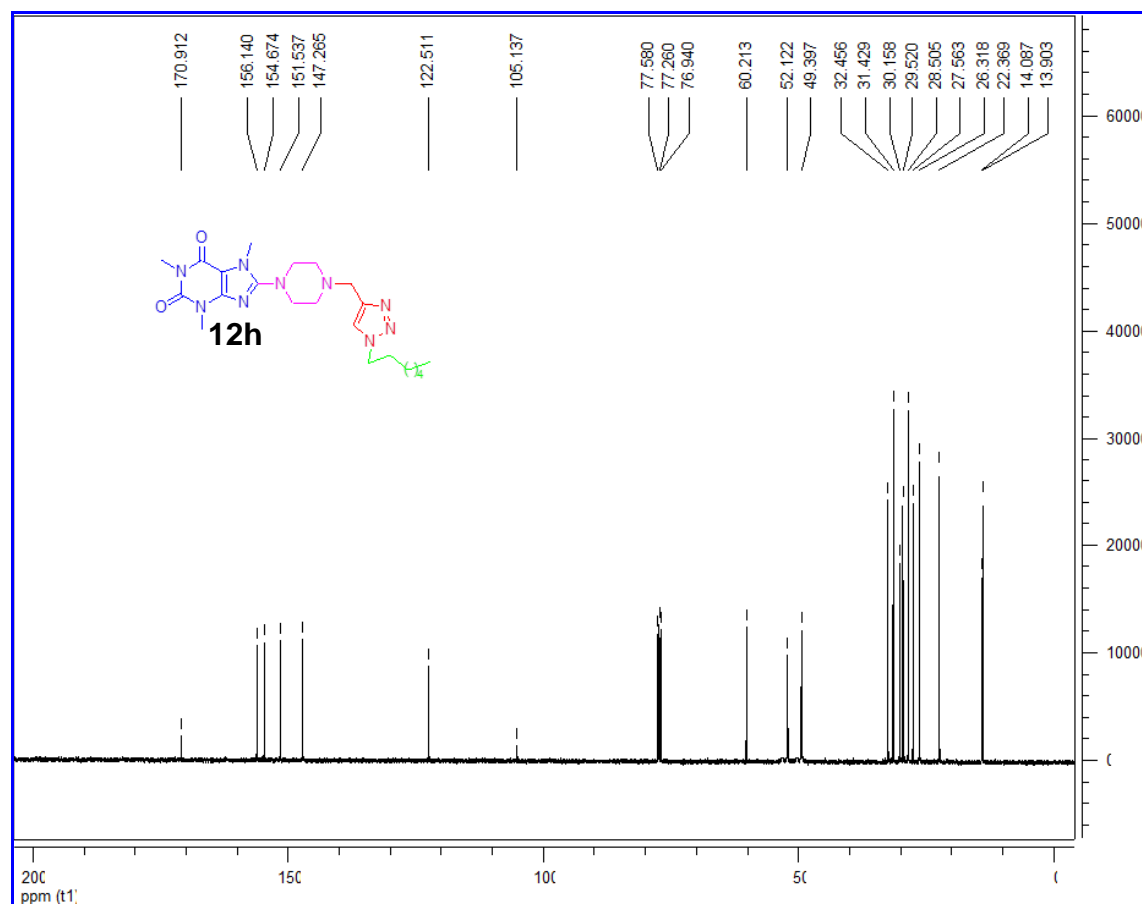

$^1\text{H}$ NMR and  $^{13}\text{C}$ NMR of **12h**

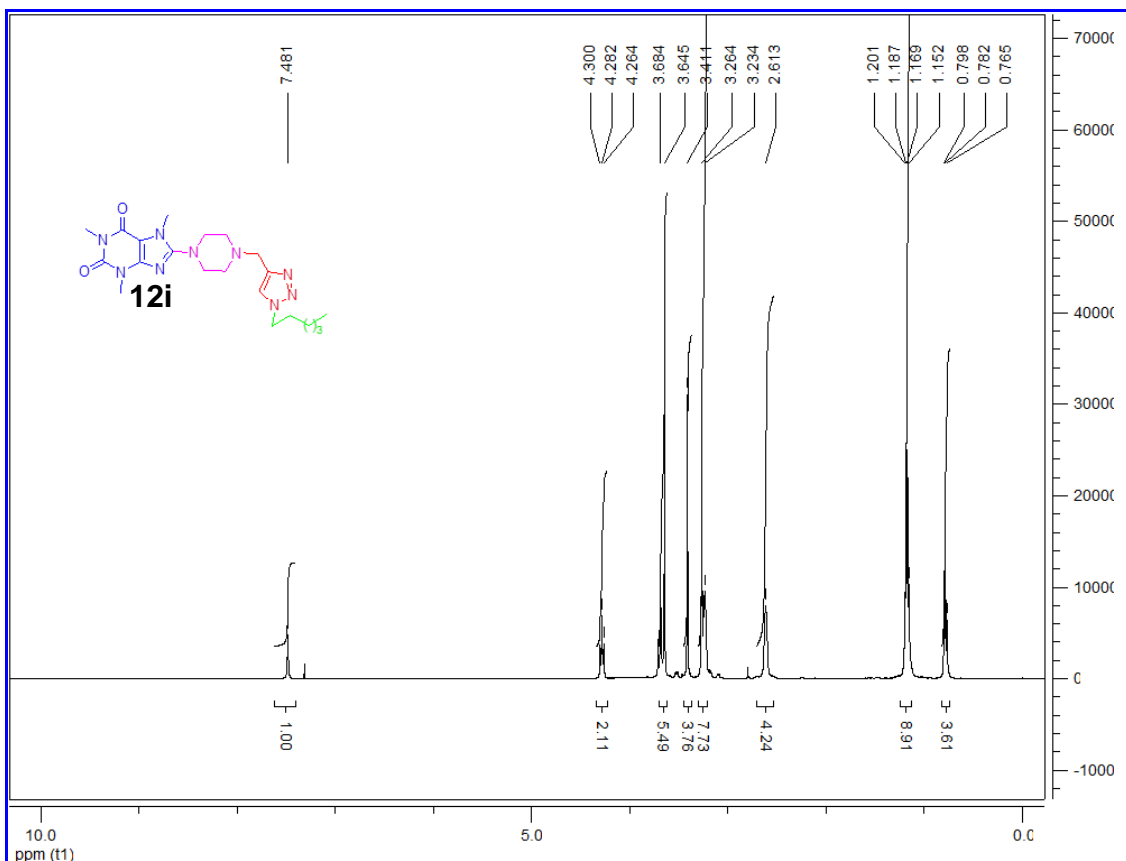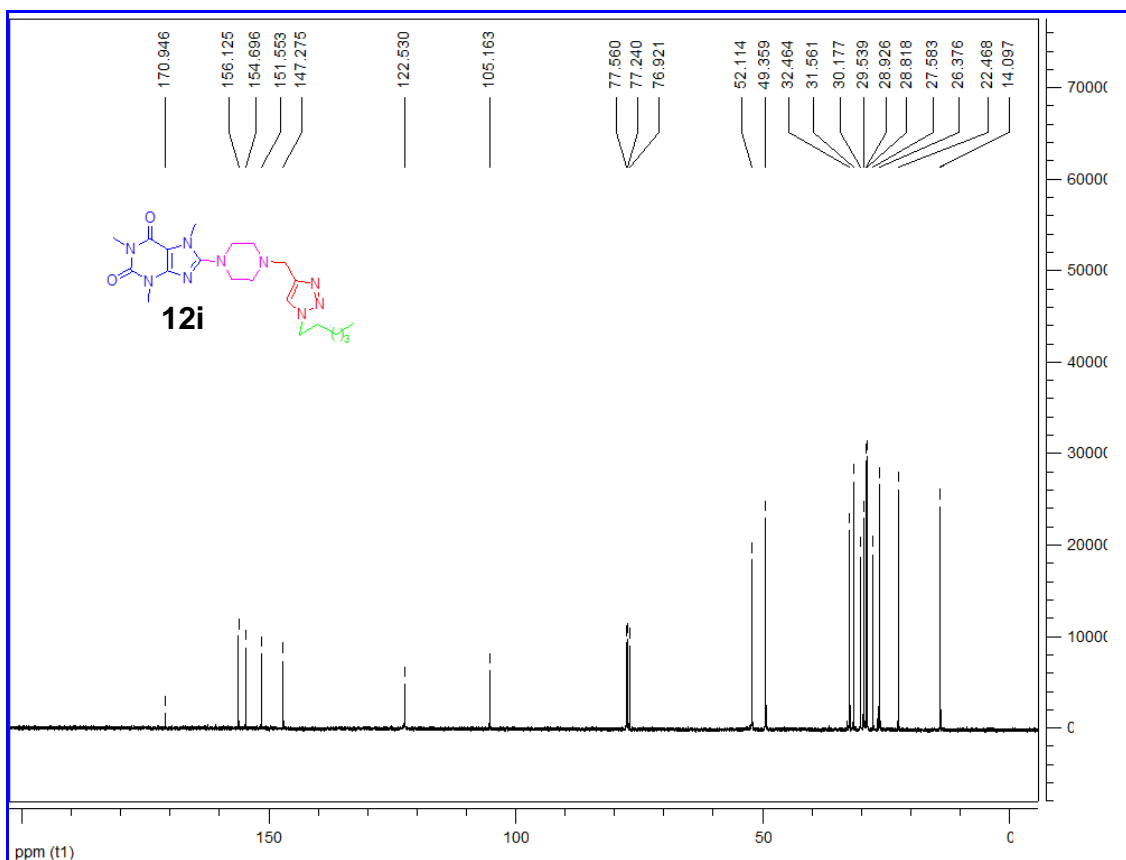

<sup>1</sup>H NMR and <sup>13</sup>C NMR of **12i**

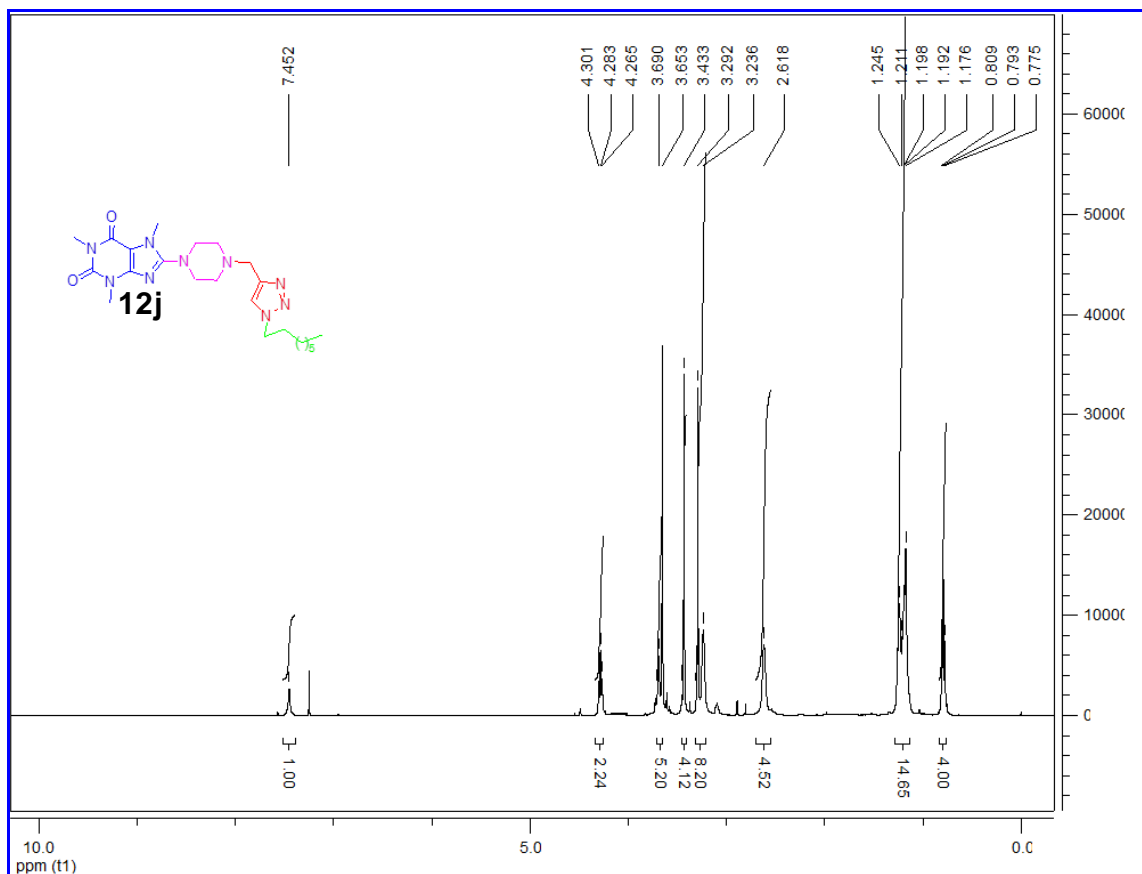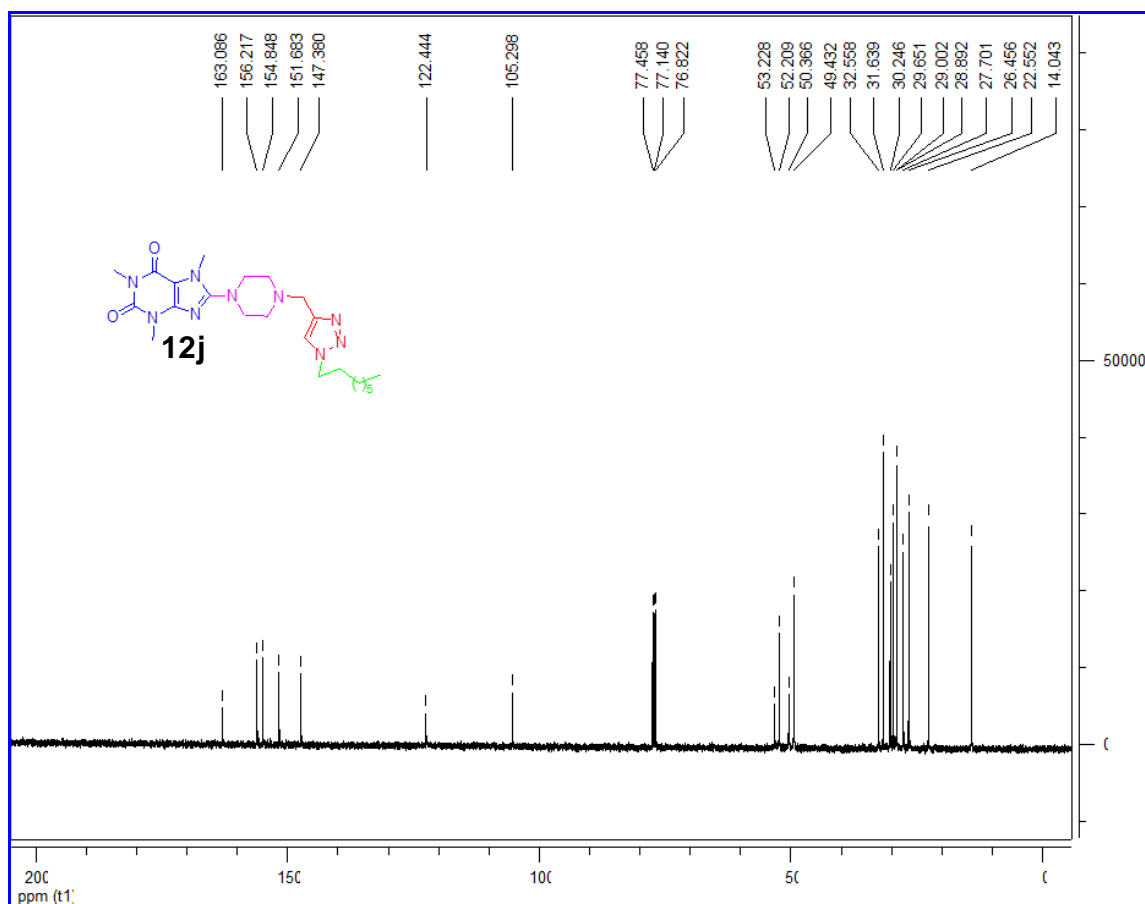

**<sup>1</sup>H NMR and <sup>13</sup>C NMR of 12j**

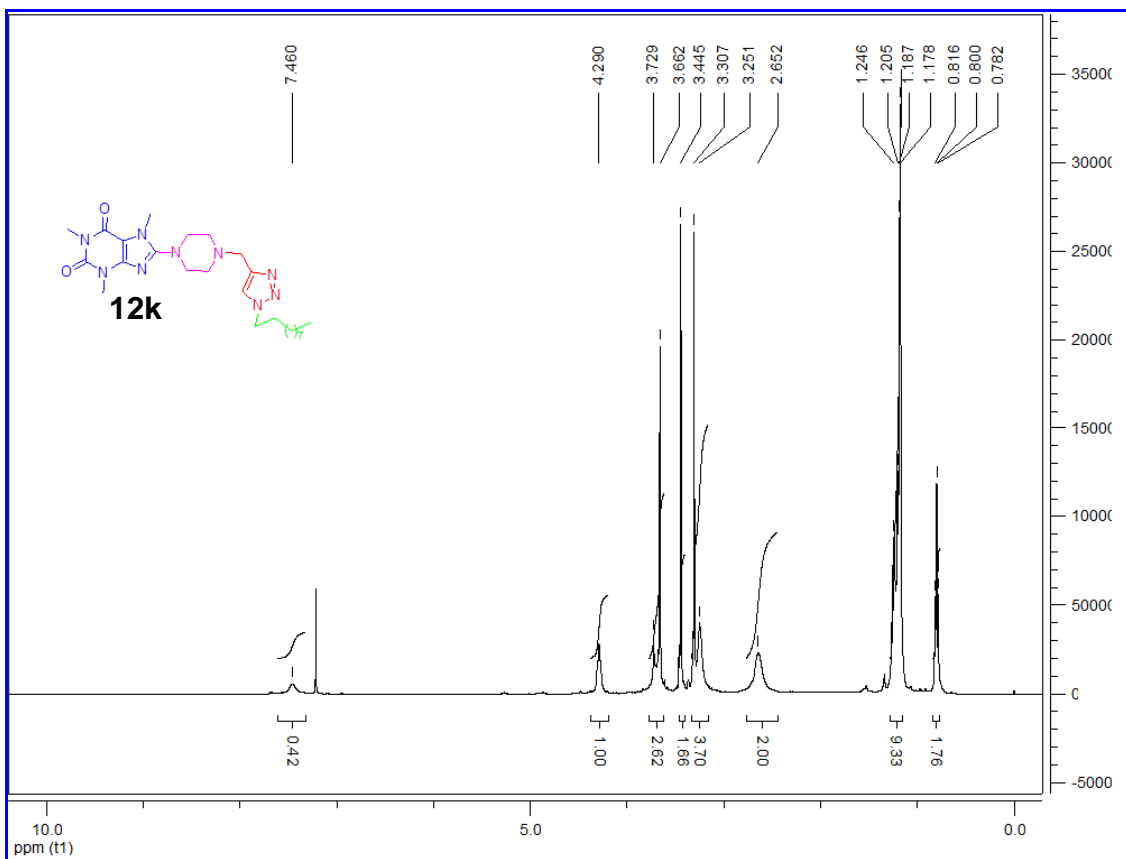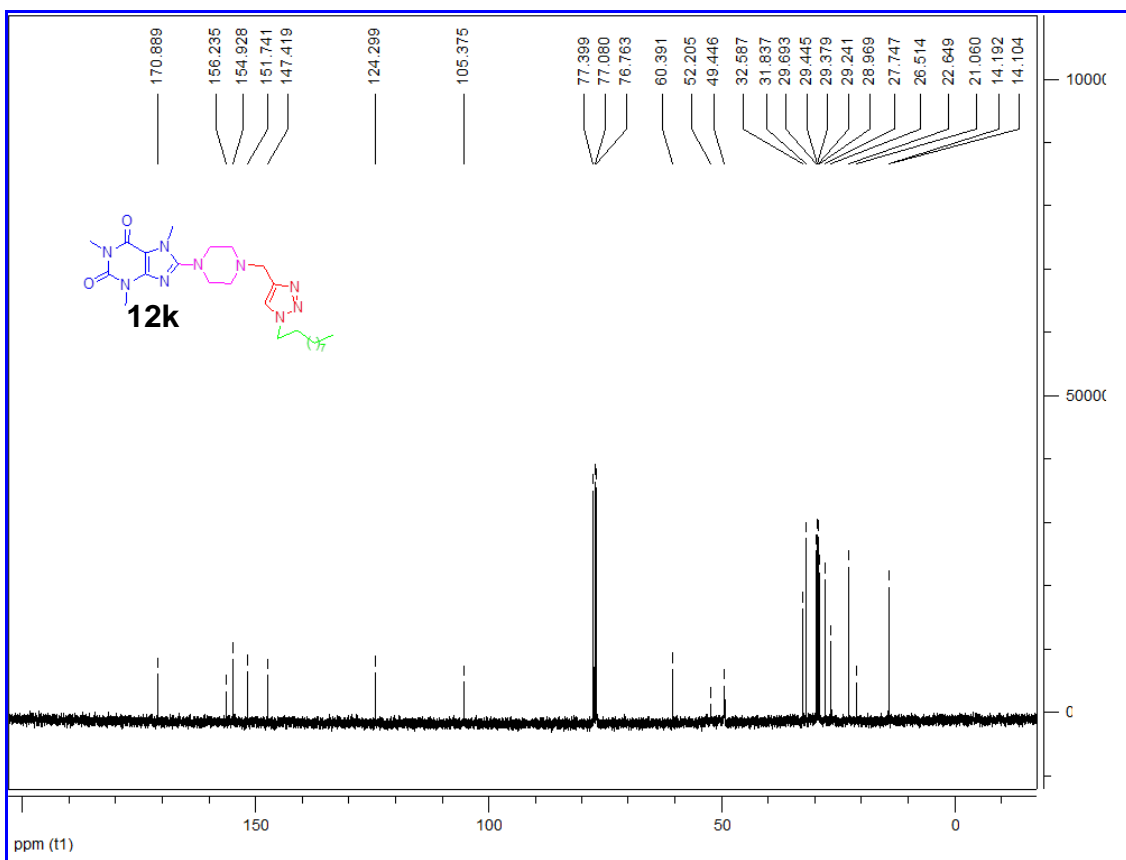

$^1\text{H}$ NMR and  $^{13}\text{C}$ NMR of **12k**



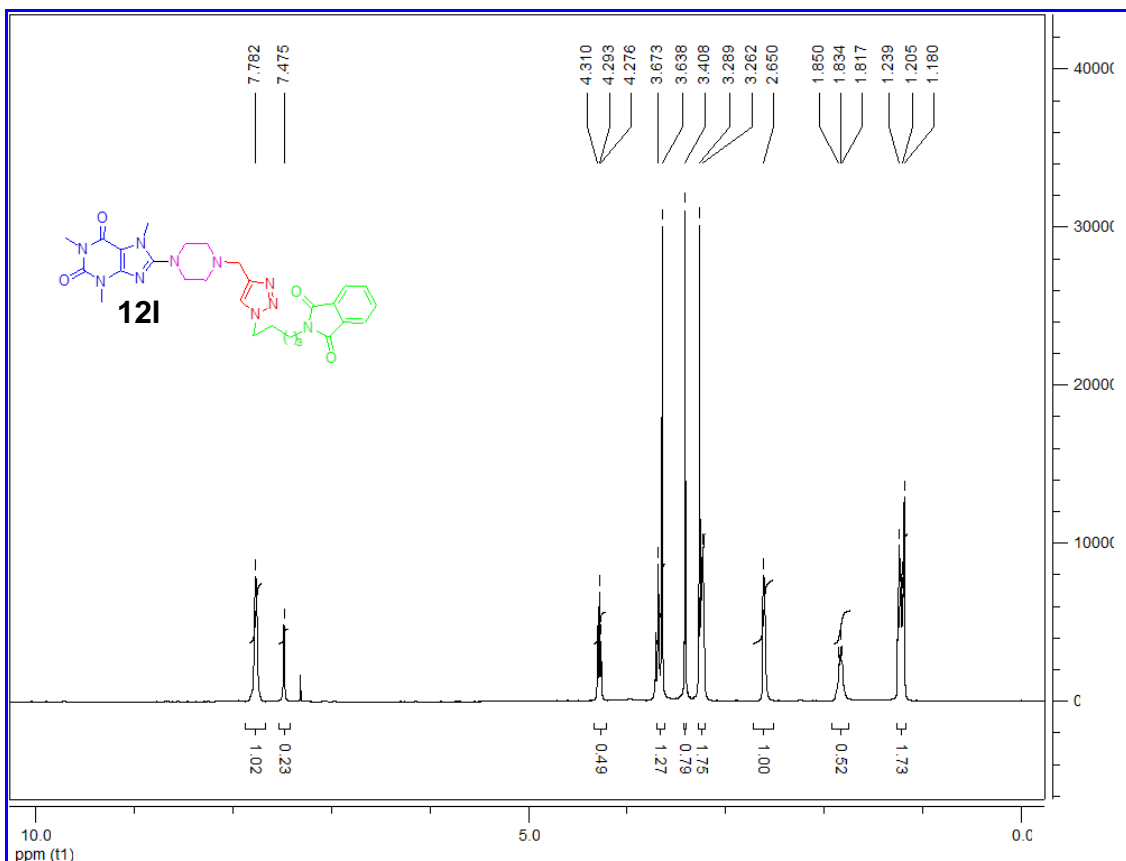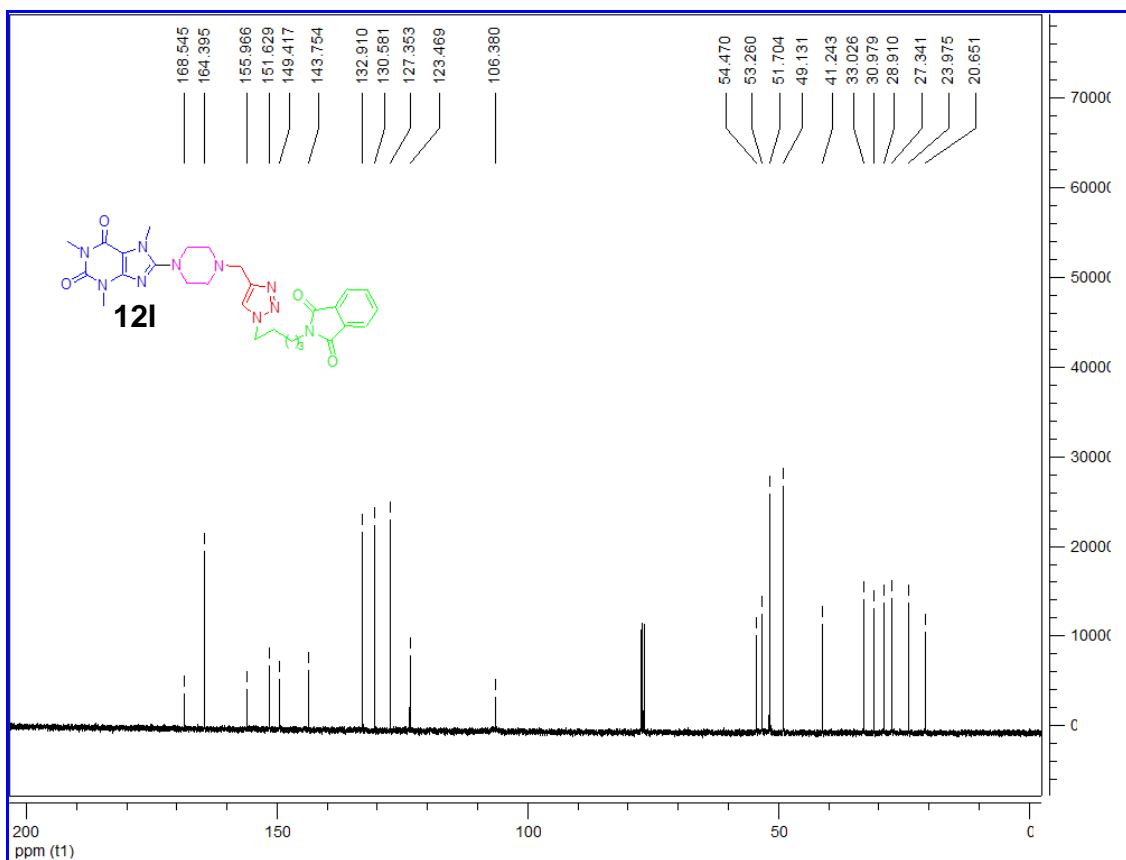

$^1\text{H}$ NMR and  $^{13}\text{C}$ NMR of **121**

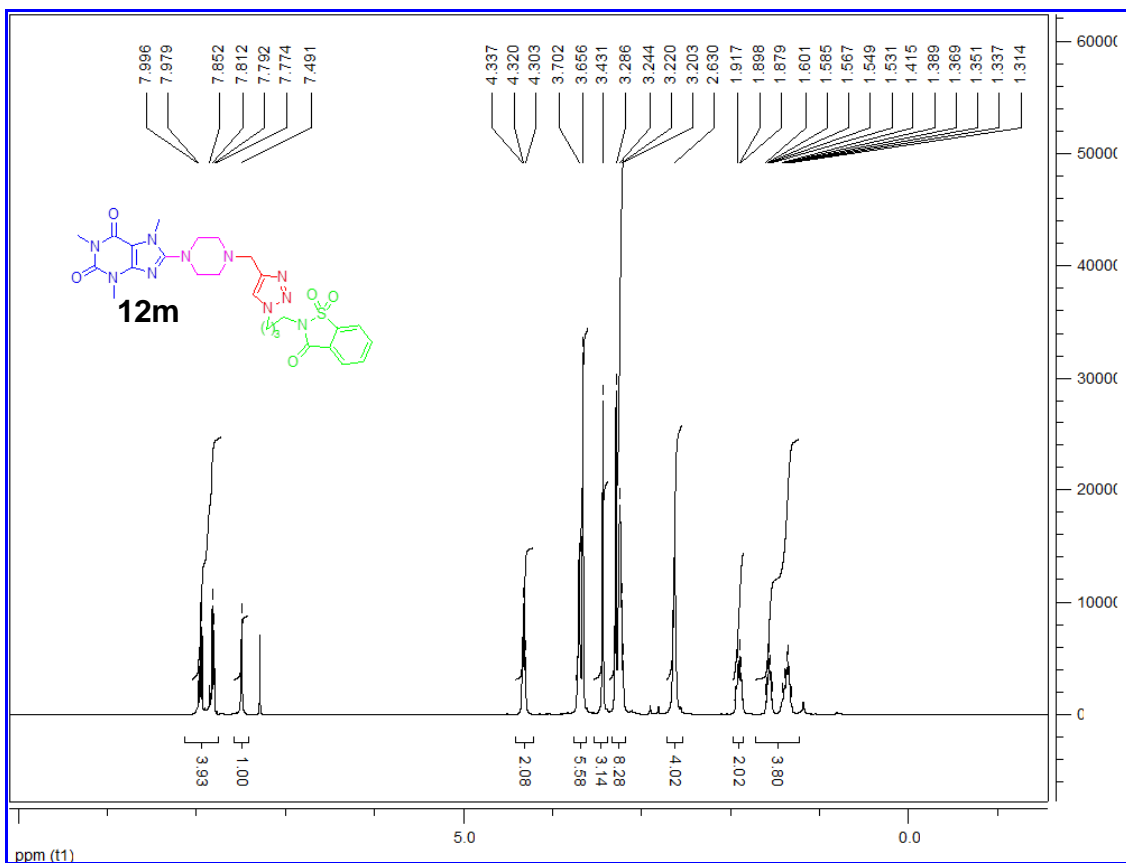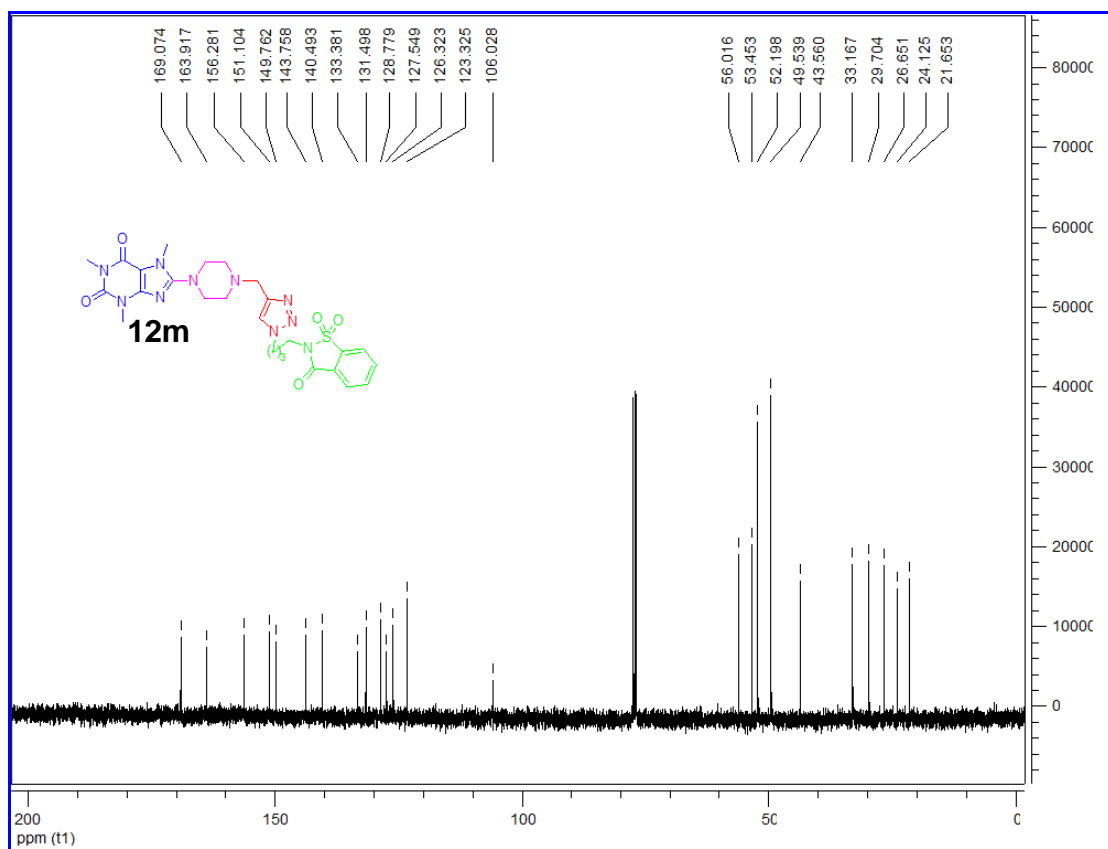

**<sup>1</sup>H NMR and <sup>13</sup>C NMR of 12m**

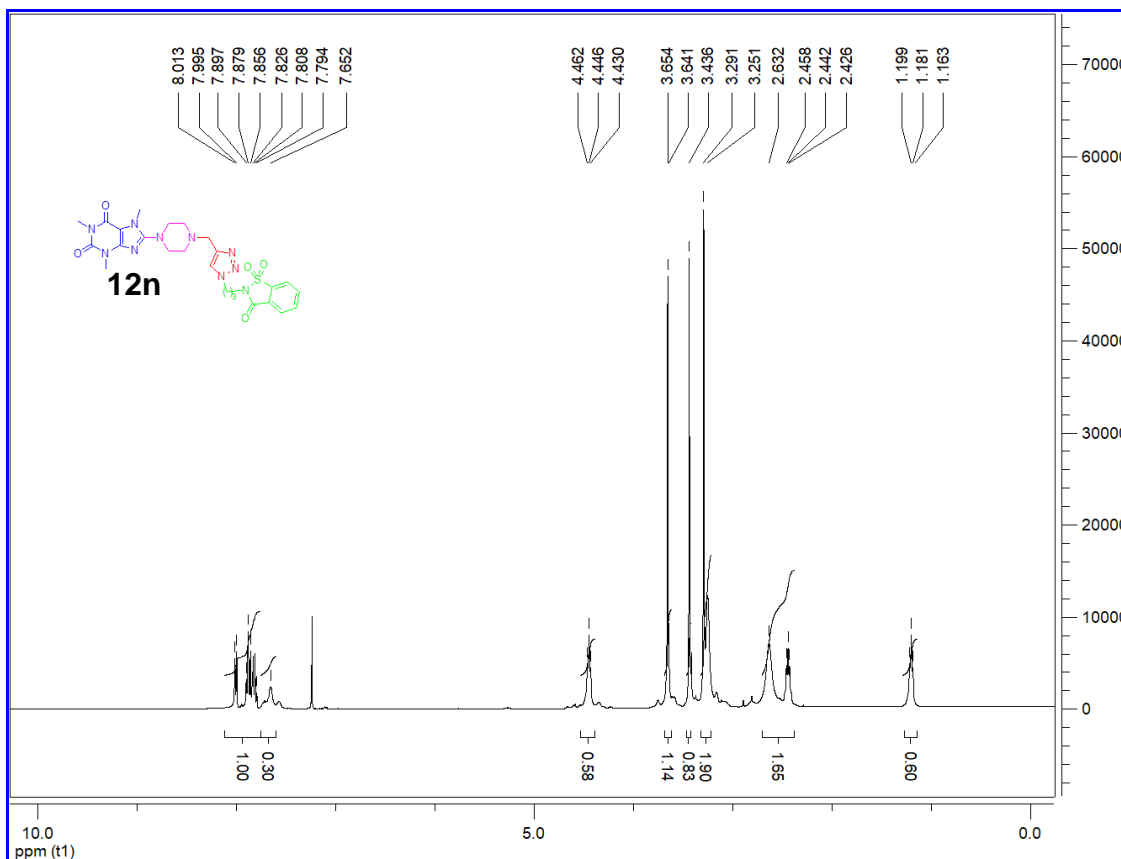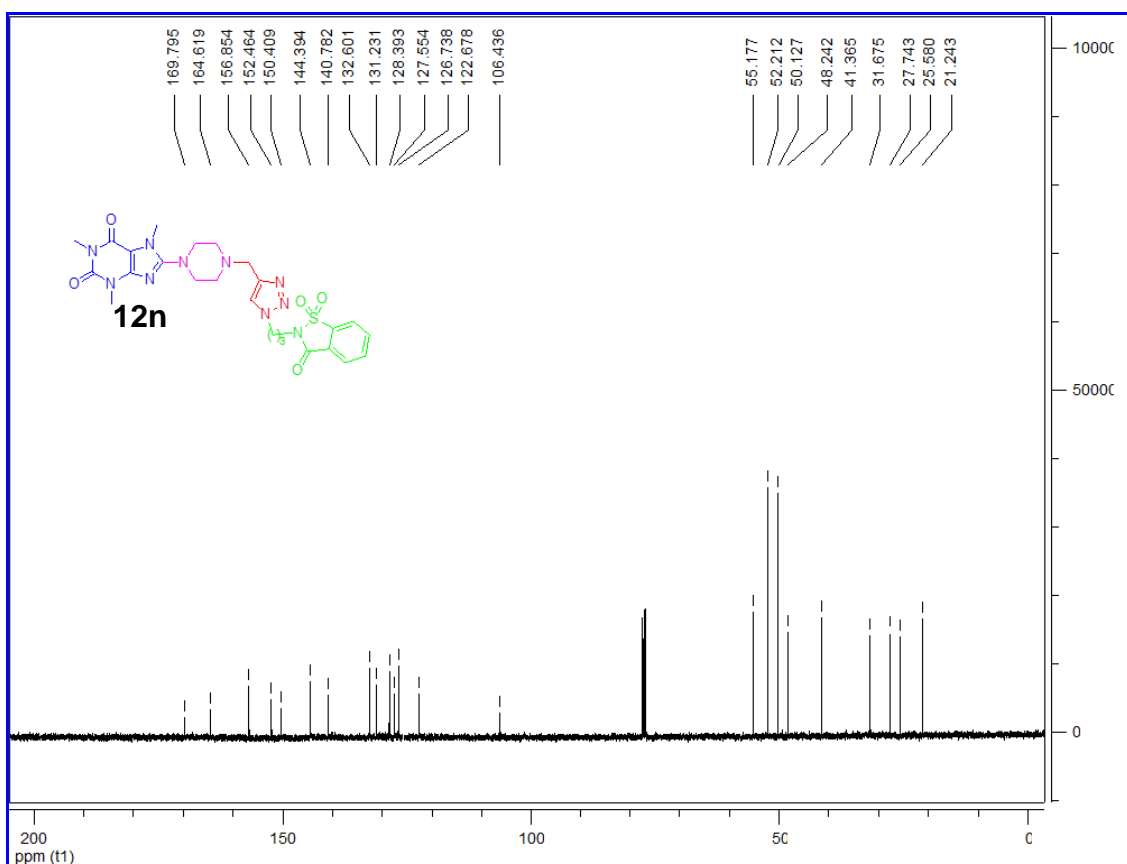

**<sup>1</sup>H NMR and <sup>13</sup>C NMR of 12n**

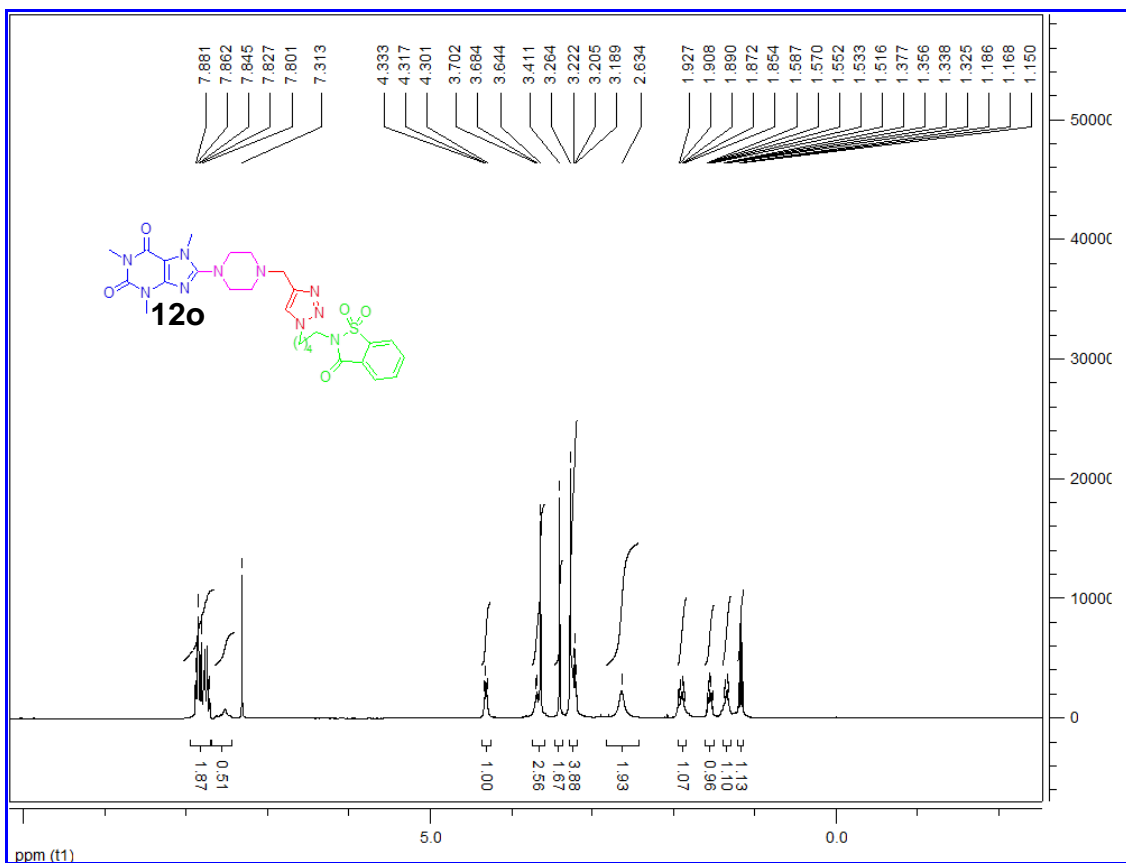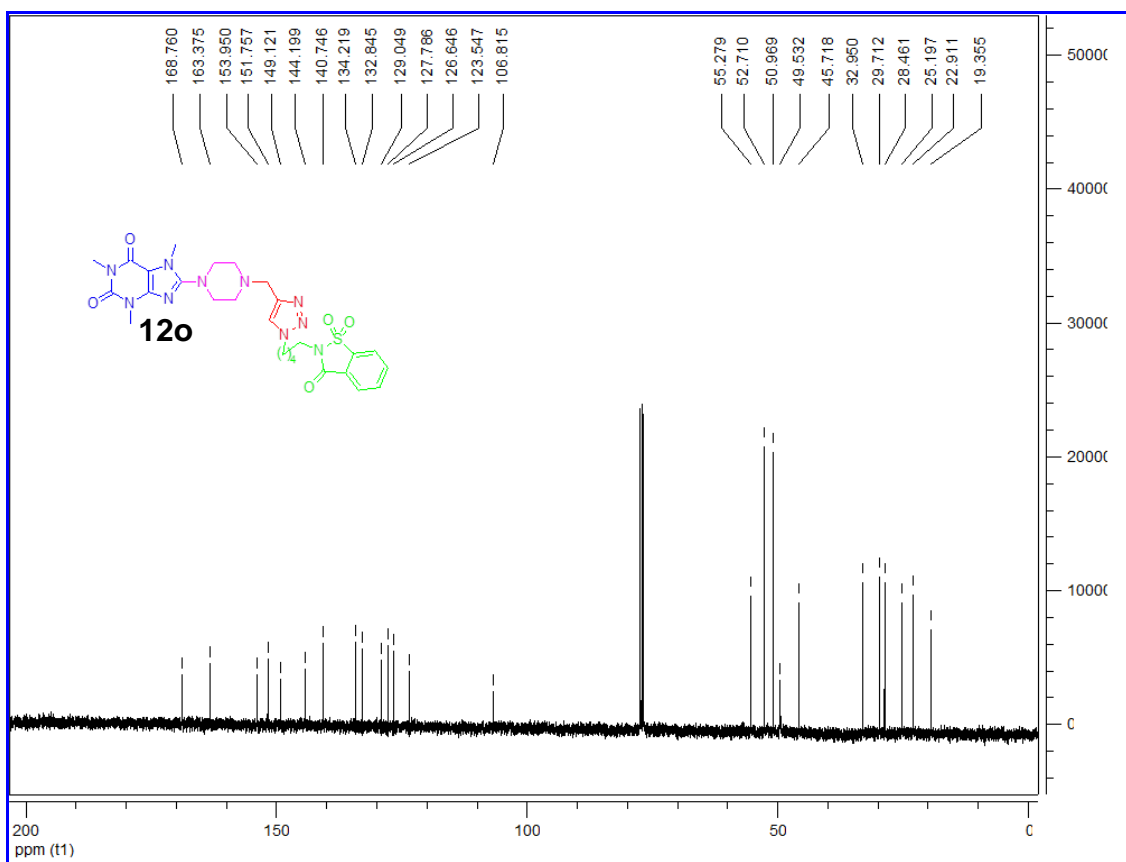

**<sup>1</sup>H NMR and <sup>13</sup>C NMR of 12o**
